# Supplementary material
Source: PubMed Central journal article supplement (PMC3690839)
Supplement: 1221243110_pnas.201221243SI.pdf [file 1221243110_pnas.201221243SI.pdf]

# Supporting Information

Hu et al. 10.1073/pnas.1221243110

## SI Materials and Methods

**Cell Culture and Transfection.** Young adult mouse colon (YAMC) cells expressing both p53<sup>175H</sup> and oncogenic HRasV12 (referred to as mp53/Ras) were cultured at 33 °C and with 5% (vol/vol) CO<sub>2</sub> in RPMI growth medium (Gibco), containing 10% (vol/vol) FBS and supplements, as previously described (1, 2). All mp53/Ras cell derivatives were cultured at 39 °C in RPMI medium supplemented with 10% (vol/vol) FBS, 1× insulin–selenium–transferrin–A (ITS-A), and 2.5 µg/mL gentamicin. YAMC cells and all of their derivatives were grown on dishes coated with 1 µg/cm<sup>2</sup> of collagen I (BD Biosciences). HeLa cells, HEK-293T cells, and human colon cancer DLD-1 and HT-29 cells were maintained at 37 °C and with 5% (vol/vol) CO<sub>2</sub> in water-jacketed, humidified incubators. Growth medium was DMEM (Gibco) supplemented with 10% (vol/vol) FBS, 2 µg/mL gentamicin, and 100 µg/mL kanamycin. HEK-293T cells were transfected using Lipofectamine<sup>TM</sup> 2000 (Invitrogen) according to the manufacturer's protocol.

Genetically perturbed cells were derived by means of lentiviral infection with virus containing the appropriate cDNA or shRNA expression constructs. Lentivirus for infection was produced by transiently transfecting 293T cells. After 12 h of incubation, the transfection medium was removed from the cells and replaced with 4 mL standard growth medium; the cells were incubated for an additional 36 h. Freshly collected virus-containing media from transfected 293T cells were filtered through 0.45-µm syringe filters (Pall), and were used to infect target cells. Polyclonal cell populations stably expressing the indicated cDNAs and/or shRNAs were generated by selection in standard growth medium containing 5 µg/mL puromycin. All stable knockdown cell lines were generated using a ViraPower lentiviral expression system, whereas the FUG12-puro lentiviral vector system was used for generating the other stable cell lines.

**Molecular Biology and DNA Constructs.** Plasmid DNA constructs with Flag-tagged heterochromatin protein 1α (HP1α) cDNA and the variants with V21M, I165K, and W174A mutations were kindly provided by Mark S. Lechner (Simon Fraser University, Burnaby, BC, Canada). GFP-tagged HP1α was from Addgene. GFP-tagged STAT5A and truncated STAT5A shown in Fig. 1A were generous gifts from Nancy Reich (Stony Brook University, Stony Brook, NY). STAT5A variants encoding the V467A, Y694F, or the V467A, Y694F double mutations were generated from a wild-type human STAT5A cDNA using the QuikChange II XL Site-Directed Mutagenesis kit (Stratagene). DNA sequence substitutions were verified.

**Immunostaining, Immunoprecipitation, and Western Blotting.** For coimmunoprecipitation, HEK-293T cells were harvested in lysis buffer (50 mM Tris-HCl, pH 8.0, 250 mM NaCl, 5 mM EDTA, 1 mM DTT, 5% glycerol) supplemented with complete protease inhibitor mixture and PMSF. Portions of lysate containing equal amounts of protein (200 µg) were then immunoprecipitated overnight at 4 °C with protein G-Agarose (Roche)-bound antibodies. The beads were then washed, and associated protein complexes were recovered in SDS sample buffer. Protein samples were resolved on a 10% SDS/PAGE. Rabbit anti-FLAG (1:500; Rockland) and rabbit anti-GFP (1:500; Rockland) primary antibodies were used to detect HP1α-Flag and STAT5A-GFP, respectively.

For chromatin immunoprecipitation (ChIP), HeLa cells stably overexpressing the vector control, HP1α, or STAT5A variants

were collected and cross-linked at room temperature with formaldehyde. The cells were pelleted, lysed, and sonicated to shear the genomic DNA, and then centrifuged to remove the cell debris. A portion of the resulting chromatin lysate was prepared as the input chromatin using a QIAquick PCR Purification kit (Qiagen; 28106). The remaining chromatin lysate was incubated overnight at 4 °C with 4 µg of anti-H3K9me3 antibodies (Upstate; 07-442) or an equivalent volume of IgG for mock treatment. Agarose-A beads, preblocked with salmon sperm DNA, were added to each chromatin lysate and the samples were incubated overnight at 4 °C on a rocking platform. After elution and de-crosslinking, the chromatin was isolated using a QIAquick PCR Purification kit, and a 1-µL portion of the chromatin was used for each Sybr Green quantitative PCR (qPCR) reaction.

The following primers were used for qPCR after ChIP:

Human *IGF2*\_CpG1 forward–TGAAAGAATGTTTGGAG–GGCAGGG

Human *IGF2*\_CpG1 reverse–AGGCCAGAAACAATAGTG–GGAGGA

Human *IGF2*\_P3-a forward–TTGGGTTTCTTCCTTACAC–CCGGA

Human *IGF2*\_P3-a reverse–TTCTTTGCCTTCTCCACAC–GGA

Human *IGF2*\_P3-b forward–AAATTTGGGCATTGTTCC–CGGCTC

Human *IGF2*\_P3-b reverse–TGTGTTTGGGCAACGCTAG–AGAGA

Human GAPDH forward–CATGGGTGTGAACCATGAGA

Human GAPDH reverse–CAGTGATGGCATGGACTGTG.

**Fluorescence Recovery After Photobleaching.** Stable HeLa cell lines expressing vector control, STAT5A<sup>WT</sup>, STAT5A<sup>V467A</sup>, STAT5A<sup>Y694F</sup>, or STAT5A<sup>V467A,Y694F</sup> were generated by lentivirus infection. GFP-HP1α was transfected into these stable cell lines using Lipofectamine<sup>TM</sup> 2000 (Invitrogen). Fluorescence recovery after photobleaching (FRAP) was done using an Olympus confocal microscope. A 405-nm laser was used to irreversibly bleach a defined spot and then measure the recovery of the fluorescence intensity in the bleached spot. Quantitative analysis was done using Excel (Microsoft), and the bleached fluorescence intensity of each bleached spot was normalized to its intensity before bleaching, which was set at 100%.

**Xenograft Assays.** Tumor formation was assayed by xenotransplantation of genetically perturbed cells. Before xenotransplantation, genetically perturbed cells were grown for 48 h under standard culture conditions without selective drugs. Next, 5 × 10<sup>5</sup> cells were s. c. injected into the left and right flanks of 4- to 6-mo-old female CD-1 nude mice (CrI:CD-1-Foxn1<sup>nu</sup>, Charles River Laboratories). Tumor volumes were measured by caliper at indicated times and mice were euthanized following final tumor measurements. Tumor volume was calculated using the average of three measurements of the tumor radius and the formula volume = (4/3)πr<sup>3</sup>. The statistical significance of differences in tumor size was determined by Student *t* test. All animal procedures conformed to American Association for the Accreditation of Laboratory Animal Care (AAALAC) regulations and were approved by the

University Committee on Animal Resources (UCAR) at the University of Rochester Medical Center.

**Cell Proliferation Measurements and Flow Cytometry.** Before measuring cell proliferation, all genetically perturbed mp53/Ras cells were grown under standard culture conditions for 48 h without selective drugs. To assess proliferation, mp53/Ras cell derivatives were seeded at 3,400 cells/cm<sup>2</sup> in standard RPMI growth medium. Cell samples were counted at the indicated time points. The following formula was used to calculate doubling. Cell doubling = (the number of live cells at harvest/the number of cells initially plated) – 1.

For measuring cell cycle profiles with Flow Cytometry, 2 × 10<sup>6</sup> cells were washed with 1× PBS and resuspended with 1 mL PBS in 15-mL tubes and fixed in 75% ethanol overnight at –20 °C. Fixed cells were washed with PBS and resuspended in 1 mL of DNA staining solution [20 µg/mL propidium iodide (PI) and 200 µg/mL DNase free RNase in PBS]. After 30 min, cells were analyzed by flow cytometry with the BD FACSCanto flow cytometer.

For detecting apoptosis, Alexa Fluor 488 annexin V/Dead Cell Apoptosis kit (Invitrogen; V13241) was used. Cells were stained with Alexa Fluor 488-conjugated annexin V according to the manufacturer's instruction. Briefly, 1 × 10<sup>6</sup> cells were resuspended in 100 µL of 1× annexin-binding buffer. A total of 5 µL of Alexa Fluor 488 annexin V and 1 µL of 100 µg/mL PI were added onto the cells. Cells were then incubated for 15 min at room temperature followed by addition of 400 µL annexin-binding buffer. The stained cells were analyzed with the BD FACSCanto flow cytometer. Emission was collected at 530 nm and 575 nm with 488-nm excitation as recommended by the manufacturer.

**Reverse Transcription and qPCR.** Total RNA was isolated from cells using an RNeasy Mini kit (Qiagen). cDNA was generated for qPCR analysis by using SuperScript II reverse transcriptase and oligo-dT as primers. SYBR Green-based quantitative PCR was performed using Bio-Rad iQ SYBR Green master mix, specific forward and reverse primers, and an iCycler machine (Bio-Rad). Gene expression was calculated using the  $\Delta\Delta C_t$  method, and RhoA or GAPDH expression was used for normalization.

**Microarray Studies.** Total RNA was purified from 1 × 10<sup>6</sup> cells expressing desired transgene using a RNeasy Mini kit (Qiagen) according to the manufacturer's instructions. Two hundred nanograms of total RNA was used to synthesize the first strand of cDNA using ArrayScript reverse transcriptase and an oligo(dT) primer bearing a T7 promoter. The single-stranded cDNA was then converted into a double-stranded DNA (dsDNA) using DNA polymerase I in the presence of *Escherichia coli* RNase H and DNA ligase. The dsDNA was used to make biotin-labeled antisense RNA (aRNA) by in vitro transcription using an Ambion MessageAmp Premier RNA Amplification kit (Applied Biosystems). A total of 750 ng of purified aRNA per sample was applied to an Illumina HumanHT-12 v4 chip at 58 °C for 18 h. After washing and staining with streptavidin-Cy3, the chip was scanned using an Illumina BeadArray Reader and standard DirectHyb Gene Expression protocol with the following settings: factor = 1, photomultiplier tube (PMT) = 587, filter = 100%. The raw data were extracted using Illumina BeadStudio software without normalization. The raw intensity data from the gene chips were normalized and further analyzed using computer software, which included Excel, Bioconductor, Illumina Gene Expression Module, and GenePattern (Broad Institute).

1. McMurray HR, et al. (2008) Synergistic response to oncogenic mutations defines gene class critical to cancer phenotype. *Nature* 453(7198):1112–1116.

2. Xia M, Land H (2007) Tumor suppressor p53 restricts Ras stimulation of RhoA and cancer cell motility. *Nat Struct Mol Biol* 14(3):215–223.

Graphic Summary

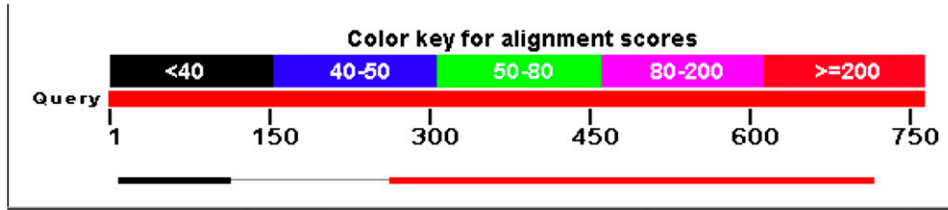

Score = 327 bits (837), Expect = 3e-103, Method: Compositional matrix adjust.  
 Identities = 195/470 (41%), Positives = 274/470 (58%), Gaps = 39/470 (8%)

```

STAT92E, 265 ELKNWRHQQAQAGNGAPFNEGLDDIQRCEMLESFIAHMLAAVK--ELMRVRLVTEEPE
STAT5A, 251 ELIQWKRRLQQLAGNGGF-PEGLDVLQSWCEKLAELIWNQRQQIRRAEHLCCQLPIPGPV
      * * * * * * * * * * * * * * * * * * * * * * * * * * * * * * * *
STAT92E, 323 LTHLLE--QVQNAQKNLVCSAFIVDKQPPQVMKTNTRFAASVRWLIQSGLGIHNNPPTV
STAT5A, 310 EEMLAEVNATITDIISALVTSTFIEKQPPQVLKTQTKFAATVRLLVGGKLNVMHNPQV
      * * * * * * * * * * * * * * * * * * * * * * * * * * * * * * * *
STAT92E, 380 ECIIMSEIQSRFVTRNTQMDNSSLSGQSSGEIQNASSTMEYQQNNHVFSASFRNMQLKK
STAT5A, 370 KATIISEQQAKSL-----LKNENTRNECSGEILNCCVMMEYHQATGTLSAHFRNMSLKR
      * * * * * * * * * * * * * * * * * * * * * * * * * * * * * * * *
STAT92E, 440 IKRAEKKGTESVMDEKFFLFFYTTT--NDFQIRVWTLVSLPPVVVIVHGNQEPQSWATIT
STAT5A, 424 IKRADRRGAESVTEKFTVLFESQFSVGSNELVFQVKTLSLPVVVIVHGSQDHNATATVL
      * * * * * * * * * * * * * * * * * * * * * * * * * * * * * * * *
STAT92E, 498 WDNAFAEIVRDPFEMITDRVTWAQLSVALNIKFGS--CTGRSLTIDNLDFLYEKLQREERS
STAT5A, 484 WDNAFAEGRVFPFAVPDKVLPQLCEALNMKFAEVQSNRGLTKENLVFLAQKLFNNSSS
      * * * * * * * * * * * * * * * * * * * * * * * * * * * * * * * *
STAT92E, 556 EY-----ITWNQFCPEMPDRSFTFWFWFAIMKLTGDHMLGMWKAGCIMGFINKTKA
STAT5A, 544 HLEDYSGLSVSWQFNRENLPGWNYTFWQWFDGVMVLEKHHKPHWNGAAILGFVNKQQA
      * * * * * * * * * * * * * * * * * * * * * * * * * * * * * * * *
STAT92E, 609 QTDLLRSVYIGTFLRFSDSELGGVTIAYVNEGLVTM--LAPWTARDFQVLNLADRIR
STAT5A, 604 HDLLINKPDG--TFLLRFSDSEIGGITIAWKFDSPERNLWNLKPFTRDFSIKSLADRLG
      * * * * * * * * * * * * * * * * * * * * * * * * * * * * * * * *
STAT92E, 667 DLDVLCWLHP
STAT5A, 662 DLSYLIYVFP
      * * * * *
  
```

Fig. S1. Alignment of STAT92E and STAT5A. Graphic summary and an alignment of homologous sequences found in STAT92E (*Drosophila*) and human STAT5A generated using BLASTP. Among the seven human STAT proteins, the one showing the most identity to *Drosophila* STAT92E is STAT5A. In a homologous domain of 470 residues in STAT5A, 42.8% are identical to the corresponding residues in STAT92E. Like STAT92E, STAT5A contains the potential HP1-binding motif PVVVI (red letters beginning at amino acid 465).













stably expressing indicated transgenes and elected genes from “cancer genes” and “cell cycle/apoptosis genes” as listed in *A* were reverse transcribed into cDNA and subjected to qPCR analyses. GAPDH transcripts were used as control. Relative expression levels are shown as fold changed compared with empty vector transfected control DLD-1 cells. Error bars indicate SDs of two independent RNA isolation, each assayed in triplicates. (*C* and *D*) Down-regulation of STAT5 and HP1 $\alpha$  in human cancer samples. Genomic alterations in STAT5A, STAT5B, and HP1 $\alpha$  (also known as CBX5) across the indicated sets of tumor samples are shown as OncoPrints, which were generated using cBio Cancer Genomics Portal (1). Each column represents an individual case or patient sample. Those cases without alteration of genomic data (gray columns) are only partially shown. Expression changes are based on microarray data with a z-score threshold of  $\pm 2$ . (*D*) Disease-free survival data for the completed studies for the Memorial Sloan-Kettering Cancer Center patients with prostate cancer.

1. Cerami E, et al. (2012) The cBio cancer genomics portal: An open platform for exploring multidimensional cancer genomics data. *Cancer Discov* 2(5):401–404.

## Other Supporting Information Files

[Table S1 \(DOCX\)](#)

[Table S2 \(DOCX\)](#)
